# Supplementary material for: Socioeconomic and Climate Effects on Changes in Wetlands in China during a Three-Decade Period of Rapid Growth
Source: MDPI journal article supplement (doi:10.3390/rs15061683), 2023-03-21
Supplement: s1 [file s1]

Archive with 2 entries (2 files):
- Supplementary Figures.pdf
- Supplementary Tables.xlsx
