# Supplementary material for: Socioeconomic and Climate Effects on Changes in Wetlands in China during a Three-Decade Period of Rapid Growth
Source: MDPI journal article supplement (doi:10.3390/rs15061683), 2023-03-21
Supplement: s1 [file s1 › Supplementary Figures.pdf]

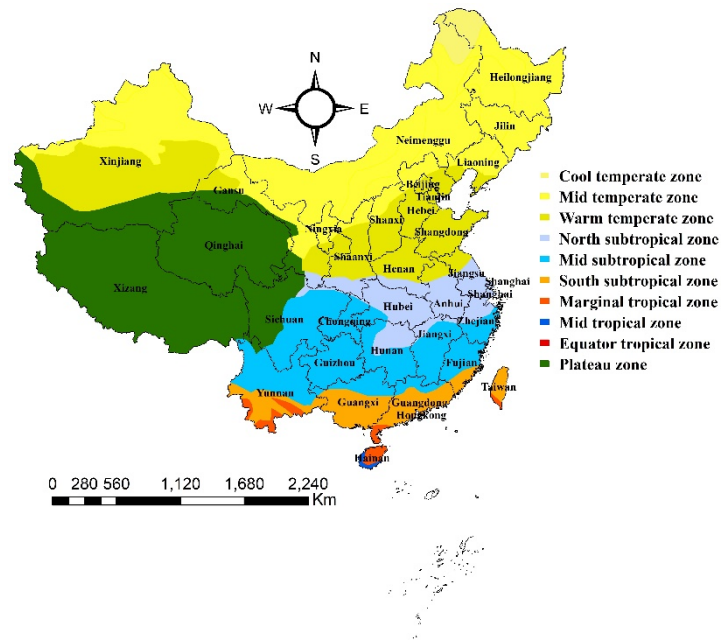

Supplementary Figure S1. Map of China with different climate zones

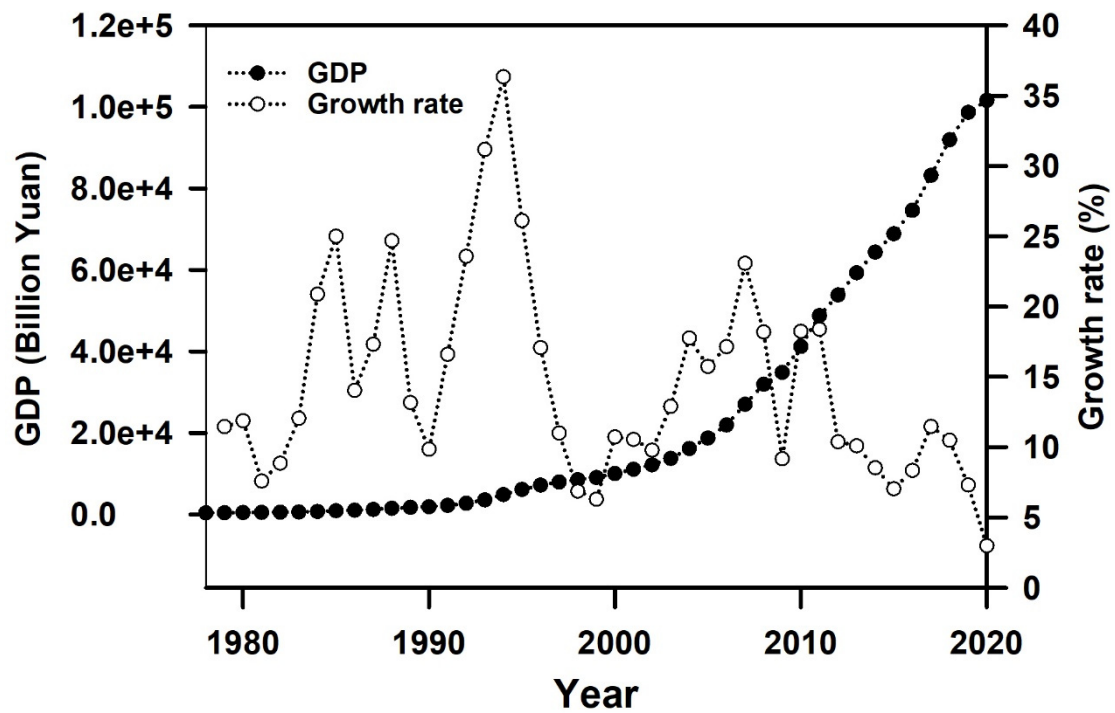

Supplementary Figure S2 The GDP and its growth rate in China from 1978 to 2020.
