# Supplementary material for: Socioeconomic and Climate Effects on Changes in Wetlands in China during a Three-Decade Period of Rapid Growth
Source: MDPI journal article supplement (doi:10.3390/rs15061683), 2023-03-21
Supplement: s1 [file s1 › Supplementary Tables.xlsx]

## Sheet: Table S1
Table S1 Data types, scale, unit, sources, and pre-processing.
Data types	Scale	Unit	Pre-processing	Sources
Wetland area	National and 31 regions; 1978, 1990, 2000, 2008	km2	Standardization	(Gong et al., 2010; Niu et al., 2012)
Annual temperature	National and 31 regions; 1990, 2000, 2008	°C	Standardization	National and provincial statistical yearbooks
Annual precipitation	National and 31 regions; 1990, 2000, 2008	mm	Standardization	National and provincial statistical yearbooks
Annual sunshine	National and 31 regions; 1990, 2000, 2008	hours	Standardization	National and provincial statistical yearbooks
Primary industry added value	National and 31 regions; 1978, 1990, 2000, 2008	yuan	Standardization	National and provincial statistical yearbooks
Secondary industry added value	National and 31 regions; 1978, 1990, 2000, 2008	yuan	Standardization	National and provincial statistical yearbooks
Industry added value	National and 31 regions; 1978, 1990, 2000, 2008	yuan	Standardization	National and provincial statistical yearbooks
Construction industry value added	National and 31 regions; 1978, 1990, 2000, 2008	yuan	Standardization	National and provincial statistical yearbooks
Tertiary industry added value	National and 31 regions; 1978, 1990, 2000, 2008	yuan	Standardization	National and provincial statistical yearbooks
GDP per capita	National and 31 regions; 1978, 1990, 2000, 2008	yuan	Standardization	National and provincial statistical yearbooks
Primary industry ratio	National and 31 regions; 1978, 1990, 2000, 2008	%	Standardization	National and provincial statistical yearbooks
Secondary industry ratio	National and 31 regions; 1978, 1990, 2000, 2008	%	Standardization	National and provincial statistical yearbooks
Tertiary industry ratio	National and 31 regions; 1978, 1990, 2000, 2008	%	Standardization	National and provincial statistical yearbooks
Total population	National and 31 regions; 1981, 1990, 2000, 2008	individuals	Standardization	National and provincial statistical yearbooks
Urban population	National and 31 regions; 1981, 1990, 2000, 2008	individuals	Standardization	National and provincial statistical yearbooks
Rural population	National and 31 regions; 1981, 1990, 2000, 2008	individuals	Standardization	National and provincial statistical yearbooks
Arable land	National and 31 regions; 1990, 2000, 2008	hectares	Standardization	National and provincial statistical yearbooks
Pesticide use	National and 31 regions; 1990, 2000, 2008	tons	Standardization	National and provincial statistical yearbooks
Aquatic products	National and 31 regions; 1990, 2000, 2008	tons	Standardization	National and provincial statistical yearbooks
Railway mileage	National and 31 regions; 1990, 2000, 2008	km	Standardization	National and provincial statistical yearbooks
Inland waterway mileage	National and 31 regions; 1990, 2000, 2008	km	Standardization	National and provincial statistical yearbooks
Road mileage	National and 31 regions; 1990, 2000, 2008	km	Standardization	National and provincial statistical yearbooks
Industrial wastewater	National and 31 regions; 1990, 2000, 2008	tons	Standardization	National and provincial statistical yearbooks
Domestic wastewater	National and 31 regions; 2000, 2008	tons	Standardization	National and provincial statistical yearbooks
Domestic wastewater COD	National and 31 regions; 2000, 2008	tons	Standardization	National and provincial statistical yearbooks
Urban built-up area	National and 31 regions; 2000, 2008	km2	Standardization	National and provincial statistical yearbooks
Urban land acquisition	National and 31 regions; 2000, 2008	km2	Standardization	National and provincial statistical yearbooks
Road area	National and 31 regions; 2000, 2008	km2	Standardization	National and provincial statistical yearbooks
Urban drainage	National and 31 regions; 2000, 2008	km	Standardization	National and provincial statistical yearbooks
Urban sewage treatment capacity	National and 31 regions; 2000, 2008	m3	Standardization	National and provincial statistical yearbooks
Urban green space	National and 31 regions; 2000, 2008	hectares	Standardization	National and provincial statistical yearbooks
Urban annual water supply	National and 31 regions; 2000, 2008	tons	Standardization	National and provincial statistical yearbooks
Municipal solid waste	National and 31 regions; 2000, 2008	tons	Standardization	National and provincial statistical yearbooks

## Sheet: Table S2
Table S1 Pearson correlations of all the selected climate and social-economy factors with wetland area
	Wetland area	primary industry added value	secondary industry added value	industry added value	Construction industry value added	tertiary industry added value	GDP per capita	primary industry ratio	secondary industry ratio	tertiary industry ratio	Total population	Urban population	Rural population	annual temp.	Annual precipitation	annual sunshine	Arable land	pesticide use	Aquatic products	Railway mileage	Inland waterway mileage	Road mileage	Industrial wastewater	Domestic wastewater	Domestic wastewater COD	Urban built-up area	Urban land acquisition	Road area	Urban drainage	Urban sewage treatment capacity	Urban green space	Urban annual water supply	Municipal solid waste
Wetland area	1	-0.07896	-0.04917	-0.04682	-0.07142	-0.07101	0.02743	-0.07277	0.17289	-0.21726	-0.18407	-0.08292	-0.2255	-0.59088	-0.32519	0.41726	0.34162	-0.12008	-0.1748	0.5109	0.0363	0.00501	-0.16597	-0.12622	-0.06056	0.01136	-0.05974	-0.04671	-0.05767	-0.0595	-0.03273	-0.07752	0.09084
primary industry added value	-0.07896	1	0.80094	0.79073	0.86667	0.75976	0.48815	-0.1509	0.33717	-0.22885	0.77927	0.78952	0.63558	0.29718	0.23129	-0.2617	0.33545	0.79643	0.53089	0.30755	0.42788	0.8231	0.69129	0.67885	0.72336	0.77395	0.52056	0.78528	0.75632	0.68924	0.58646	0.50518	0.59527
secondary industry added value	-0.04917	0.80094	1	0.99958	0.95179	0.97746	0.76142	-0.46958	0.50292	-0.05353	0.61531	0.83649	0.34679	0.20874	0.20765	-0.11423	0.12489	0.59834	0.63893	0.17037	0.45111	0.64312	0.75491	0.77809	0.63669	0.92335	0.54707	0.96665	0.95533	0.86487	0.81754	0.68504	0.77052
industry added value	-0.04682	0.79073	0.99958	1	0.94248	0.97828	0.75963	-0.47113	0.5012	-0.04684	0.60908	0.83433	0.33868	0.20458	0.20826	-0.10839	0.12102	0.58966	0.63802	0.16861	0.44341	0.63355	0.74997	0.78041	0.63216	0.92489	0.53698	0.96631	0.95345	0.86358	0.82539	0.69035	0.77639
Construction industry value added	-0.07142	0.86667	0.95179	0.94248	1	0.91732	0.7403	-0.42852	0.49458	-0.12148	0.64883	0.81527	0.41428	0.24163	0.1903	-0.16995	0.15927	0.65859	0.61488	0.18005	0.50877	0.7104	0.76745	0.71256	0.65111	0.85835	0.62494	0.91936	0.92494	0.83295	0.6914	0.5928	0.66786
tertiary industry added value	-0.07101	0.75976	0.97746	0.97828	0.91732	1	0.76642	-0.46256	0.42161	0.07226	0.59737	0.84604	0.31197	0.2792	0.30788	-0.17708	0.05226	0.57476	0.66193	0.10172	0.50889	0.61027	0.76773	0.8353	0.67882	0.92209	0.51228	0.95883	0.94455	0.88953	0.87528	0.75375	0.79301
GDP per capita	0.02743	0.48815	0.76142	0.75963	0.7403	0.76642	1	-0.66182	0.4737	0.14798	0.1337	0.48646	-0.14637	0.08302	0.1804	0.02034	-0.1709	0.23865	0.42305	0.11335	0.25122	0.44143	0.49262	0.49817	0.32234	0.61125	0.51962	0.69613	0.68713	0.69393	0.53055	0.42872	0.51688
primary industry ratio	-0.07277	-0.1509	-0.46958	-0.47113	-0.42852	-0.46256	-0.66182	1	-0.81867	-0.10845	-0.06648	-0.37258	0.16789	0.25078	0.25979	-0.18477	0.14146	-0.07471	-0.26444	-0.0506	-0.17084	-0.21307	-0.31342	-0.34001	-0.20836	-0.41189	-0.26663	-0.44166	-0.4387	-0.45009	-0.31695	-0.36247	-0.45011
secondary industry ratio	0.17289	0.33717	0.50292	0.5012	0.49458	0.42161	0.4737	-0.81867	1	-0.34717	0.32633	0.46805	0.16615	-0.39949	-0.46255	0.31225	0.27532	0.28135	0.25741	0.34164	0.14346	0.33474	0.39383	0.31827	0.30125	0.49764	0.3344	0.46196	0.45199	0.41699	0.26923	0.32916	0.52979
tertiary industry ratio	-0.21726	-0.22885	-0.05353	-0.04684	-0.12148	0.07226	0.14798	-0.10845	-0.34717	1	-0.25556	-0.05374	-0.35774	0.30853	0.38103	-0.20243	-0.54147	-0.16933	0.15164	-0.49798	0.0857	-0.29802	0.01382	0.1118	-0.02828	-0.06567	-0.11166	0.000134901	0.02456	0.13152	0.08656	0.18742	-0.00793
Total population	-0.18407	0.77927	0.61531	0.60908	0.64883	0.59737	0.1337	-0.06648	0.32633	-0.25556	1	0.85882	0.92792	0.36858	0.21669	-0.38311	0.47803	0.82791	0.54916	0.1759	0.51944	0.55517	0.73301	0.74325	0.8225	0.72661	0.33517	0.65301	0.64324	0.55299	0.59256	0.67863	0.63932
Urban population	-0.08292	0.78952	0.83649	0.83433	0.81527	0.84604	0.48646	-0.37258	0.46805	-0.05374	0.85882	1	0.60593	0.33205	0.31085	-0.25855	0.27644	0.76221	0.73944	0.15575	0.61278	0.58095	0.81235	0.93079	0.89991	0.93205	0.44207	0.87818	0.86059	0.78571	0.84362	0.88302	0.86793
Rural population	-0.2255	0.63558	0.34679	0.33868	0.41428	0.31197	-0.14637	0.16789	0.16615	-0.35774	0.92792	0.60593	1	0.33073	0.11027	-0.40677	0.54115	0.73098	0.31468	0.1598	0.36071	0.43935	0.54713	0.47683	0.62237	0.45008	0.19879	0.375	0.37261	0.28696	0.30627	0.41126	0.36119
annual temp.	-0.59088	0.29718	0.20874	0.20458	0.24163	0.2792	0.08302	0.25078	-0.39949	0.30853	0.36858	0.33205	0.33073	1	0.82745	-0.70346	-0.33711	0.38578	0.45139	-0.53414	0.37957	0.13084	0.41741	0.44063	0.37573	0.16316	-0.03409	0.22363	0.2357	0.29815	0.32683	0.33443	0.02112
Annual precipitation	-0.32519	0.23129	0.20765	0.20826	0.1903	0.30788	0.1804	0.25979	-0.46255	0.38103	0.21669	0.31085	0.11027	0.82745	1	-0.61108	-0.35333	0.28196	0.44041	-0.38428	0.37817	0.08422	0.32252	0.45424	0.39744	0.20028	0.00502	0.21898	0.21754	0.29415	0.40853	0.39057	0.14649
annual sunshine	0.41726	-0.2617	-0.11423	-0.10839	-0.16995	-0.17708	0.02034	-0.18477	0.31225	-0.20243	-0.38311	-0.25855	-0.40677	-0.70346	-0.61108	1	0.08654	-0.21126	-0.18667	0.33566	-0.34388	-0.20571	-0.32435	-0.31143	-0.32237	-0.08885	-0.03263	-0.10242	-0.1285	-0.1514	-0.18537	-0.20202	0.00731
Arable land	0.34162	0.33545	0.12489	0.12102	0.15927	0.05226	-0.1709	0.14146	0.27532	-0.54147	0.47803	0.27644	0.54115	-0.33711	-0.35333	0.08654	1	0.31091	-0.10062	0.74401	0.03277	0.37573	0.10176	0.07228	0.28509	0.29134	0.14494	0.15566	0.11586	0.0494	0.05646	0.07026	0.35206
pesticide use	-0.12008	0.79643	0.59834	0.58966	0.65859	0.57476	0.23865	-0.07471	0.28135	-0.16933	0.82791	0.76221	0.73098	0.38578	0.28196	-0.21126	0.31091	1	0.65272	0.16307	0.4595	0.52387	0.67056	0.6228	0.74218	0.69096	0.34133	0.6714	0.63461	0.56224	0.49568	0.58369	0.56231
Aquatic products	-0.1748	0.53089	0.63893	0.63802	0.61488	0.66193	0.42305	-0.26444	0.25741	0.15164	0.54916	0.73944	0.31468	0.45139	0.44041	-0.18667	-0.10062	0.65272	1	-0.12818	0.4378	0.21977	0.69593	0.67266	0.63549	0.68538	0.34309	0.70873	0.7043	0.61494	0.65066	0.6849	0.58059
Railway mileage	0.5109	0.30755	0.17037	0.16861	0.18005	0.10172	0.11335	-0.0506	0.34164	-0.49798	0.1759	0.15575	0.1598	-0.53414	-0.38428	0.33566	0.74401	0.16307	-0.12818	1	-0.1585	0.44069	-0.02409	-0.00115	0.16399	0.2768	0.26022	0.14827	0.08375	0.02455	0.04384	-0.01206	0.33738
Inland waterway mileage	0.0363	0.42788	0.45111	0.44341	0.50877	0.50889	0.25122	-0.17084	0.14346	0.0857	0.51944	0.61278	0.36071	0.37957	0.37817	-0.34388	0.03277	0.4595	0.4378	-0.1585	1	0.2196	0.70214	0.62003	0.67556	0.49567	0.24268	0.48174	0.54195	0.66161	0.52882	0.63575	0.39503
Road mileage	0.00501	0.8231	0.64312	0.63355	0.7104	0.61027	0.44143	-0.21307	0.33474	-0.29802	0.55517	0.58095	0.43935	0.13084	0.08422	-0.20571	0.37573	0.52387	0.21977	0.44069	0.2196	1	0.35619	0.49015	0.49709	0.57416	0.43287	0.5911	0.53789	0.44707	0.43046	0.26432	0.43948
Industrial wastewater	-0.16597	0.69129	0.75491	0.74997	0.76745	0.76773	0.49262	-0.31342	0.39383	0.01382	0.73301	0.81235	0.54713	0.41741	0.32252	-0.32435	0.10176	0.67056	0.69593	-0.02409	0.70214	0.35619	1	0.77184	0.76407	0.76728	0.42846	0.75762	0.78372	0.8546	0.67578	0.7462	0.63412
Domestic wastewater	-0.12622	0.67885	0.77809	0.78041	0.71256	0.8353	0.49817	-0.34001	0.31827	0.1118	0.74325	0.93079	0.47683	0.44063	0.45424	-0.31143	0.07228	0.6228	0.67266	-0.00115	0.62003	0.49015	0.77184	1	0.87754	0.8628	0.31735	0.81305	0.7934	0.79279	0.91128	0.92863	0.81898
Domestic wastewater COD	-0.06056	0.72336	0.63669	0.63216	0.65111	0.67882	0.32234	-0.20836	0.30125	-0.02828	0.8225	0.89991	0.62237	0.37573	0.39744	-0.32237	0.28509	0.74218	0.63549	0.16399	0.67556	0.49709	0.76407	0.87754	1	0.78653	0.31762	0.70225	0.6775	0.70206	0.73481	0.83083	0.7618
Urban built-up area	0.01136	0.77395	0.92335	0.92489	0.85835	0.92209	0.61125	-0.41189	0.49764	-0.06567	0.72661	0.93205	0.45008	0.16316	0.20028	-0.08885	0.29134	0.69096	0.68538	0.2768	0.49567	0.57416	0.76728	0.8628	0.78653	1	0.52525	0.95529	0.92609	0.8383	0.88448	0.84059	0.92145
Urban land acquisition	-0.05974	0.52056	0.54707	0.53698	0.62494	0.51228	0.51962	-0.26663	0.3344	-0.11166	0.33517	0.44207	0.19879	-0.03409	0.00502	-0.03263	0.14494	0.34133	0.34309	0.26022	0.24268	0.43287	0.42846	0.31735	0.31762	0.52525	1	0.52995	0.51659	0.48216	0.32974	0.31936	0.37341
Road area	-0.04671	0.78528	0.96665	0.96631	0.91936	0.95883	0.69613	-0.44166	0.46196	0.000134901	0.65301	0.87818	0.375	0.22363	0.21898	-0.10242	0.15566	0.6714	0.70873	0.14827	0.48174	0.5911	0.75762	0.81305	0.70225	0.95529	0.52995	1	0.97754	0.88137	0.8521	0.75303	0.81421
Urban drainage	-0.05767	0.75632	0.95533	0.95345	0.92494	0.94455	0.68713	-0.4387	0.45199	0.02456	0.64324	0.86059	0.37261	0.2357	0.21754	-0.1285	0.11586	0.63461	0.7043	0.08375	0.54195	0.53789	0.78372	0.7934	0.6775	0.92609	0.51659	0.97754	1	0.87342	0.82287	0.73675	0.77122
Urban sewage treatment capacity	-0.0595	0.68924	0.86487	0.86358	0.83295	0.88953	0.69393	-0.45009	0.41699	0.13152	0.55299	0.78571	0.28696	0.29815	0.29415	-0.1514	0.0494	0.56224	0.61494	0.02455	0.66161	0.44707	0.8546	0.79279	0.70206	0.8383	0.48216	0.88137	0.87342	1	0.79338	0.75522	0.70684
Urban green space	-0.03273	0.58646	0.81754	0.82539	0.6914	0.87528	0.53055	-0.31695	0.26923	0.08656	0.59256	0.84362	0.30627	0.32683	0.40853	-0.18537	0.05646	0.49568	0.65066	0.04384	0.52882	0.43046	0.67578	0.91128	0.73481	0.88448	0.32974	0.8521	0.82287	0.79338	1	0.87872	0.818
Urban annual water supply	-0.07752	0.50518	0.68504	0.69035	0.5928	0.75375	0.42872	-0.36247	0.32916	0.18742	0.67863	0.88302	0.41126	0.33443	0.39057	-0.20202	0.07026	0.58369	0.6849	-0.01206	0.63575	0.26432	0.7462	0.92863	0.83083	0.84059	0.31936	0.75303	0.73675	0.75522	0.87872	1	0.84971
Municipal solid waste	0.09084	0.59527	0.77052	0.77639	0.66786	0.79301	0.51688	-0.45011	0.52979	-0.00793	0.63932	0.86793	0.36119	0.02112	0.14649	0.00731	0.35206	0.56231	0.58059	0.33738	0.39503	0.43948	0.63412	0.81898	0.7618	0.92145	0.37341	0.81421	0.77122	0.70684	0.818	0.84971	1

## Sheet: Table S3
Table S2 Pearson correlation of climate and social-economic factors on wetland types changes
		C1	C2	C3	C4	C5	I1	I2	I3	H1	H2	H3	H4
primary industry added value	Pearson Corr.	-0.86859	-0.66552	-0.76087	0.41711	-0.99283	-0.69791	-0.80024	-0.81634	0.93184	-0.11505	0.77407	-0.9901
	p-value	0.13141	0.33448	0.23913	0.58289	0.00717	0.30209	0.19976	0.18366	0.06816	0.88495	0.22593	0.0099
secondary industry added value	Pearson Corr.	-0.90401	-0.56335	-0.66749	0.29697	-0.96903	-0.6108	-0.72312	-0.73087	0.89037	-0.01013	0.68255	-0.96895
	p-value	0.09599	0.43665	0.33251	0.70303	0.03097	0.3892	0.27688	0.26913	0.10963	0.98987	0.31745	0.03105
industry added value	Pearson Corr.	-0.90397	-0.56411	-0.66824	0.29783	-0.96932	-0.61136	-0.72365	-0.73162	0.8909	-0.01067	0.68329	-0.96914
	p-value	0.09603	0.43589	0.33176	0.70217	0.03068	0.38864	0.27635	0.26838	0.1091	0.98933	0.31671	0.03086
Construction industry value added	Pearson Corr.	-0.90425	-0.5581	-0.66228	0.29108	-0.96701	-0.60691	-0.71944	-0.72567	0.88668	-0.00635	0.67741	-0.9676
	p-value	0.09575	0.4419	0.33772	0.70892	0.03299	0.39309	0.28056	0.27433	0.11332	0.99365	0.32259	0.0324
tertiary industry added value	Pearson Corr.	-0.90441	-0.55835	-0.66259	0.29134	-0.96718	-0.60699	-0.71954	-0.72603	0.88707	-0.0063	0.67772	-0.96765
	p-value	0.09559	0.44165	0.33741	0.70866	0.03282	0.39301	0.28046	0.27397	0.11293	0.9937	0.32228	0.03235
GDP per capita	Pearson Corr.	-0.89956	-0.58137	-0.68428	0.31766	-0.97445	-0.62609	-0.73695	-0.74653	0.89899	-0.02741	0.69906	-0.97372
	p-value	0.10044	0.41863	0.31572	0.68234	0.02555	0.37391	0.26305	0.25347	0.10101	0.97259	0.30094	0.02628
primary industry ratio	Pearson Corr.	0.82418	0.74807	0.84795	-0.53762	0.96962	0.70901	0.80633	0.91328	-0.9996	0.14948	-0.85847	0.92399
	p-value	0.17582	0.25193	0.15205	0.46238	0.03038	0.29099	0.19367	0.08672	0.000402487	0.85052	0.14153	0.07601
secondary industry ratio	Pearson Corr.	-0.76132	0.30709	0.14474	-0.51948	-0.32816	0.37178	0.22413	-0.000911654	0.41244	0.84528	-0.12663	-0.21228
	p-value	0.23868	0.69291	0.85526	0.48052	0.67184	0.62822	0.77587	0.99909	0.58756	0.15472	0.87337	0.78772
tertiary industry ratio	Pearson Corr.	-0.61021	-0.92529	-0.97315	0.77617	-0.92908	-0.90702	-0.95757	-0.98978	0.93021	-0.47662	0.97782	-0.92273
	p-value	0.38979	0.07471	0.02685	0.22383	0.07092	0.09298	0.04243	0.01022	0.06979	0.52338	0.02218	0.07727
Total population	Pearson Corr.	-0.63004	-0.91534	-0.96611	0.75873	-0.93971	-0.90136	-0.95529	-0.98483	0.93536	-0.45881	0.97135	-0.93446
	p-value	0.36996	0.08466	0.03389	0.24127	0.06029	0.09864	0.04471	0.01517	0.06464	0.54119	0.02865	0.06554
Urban population	Pearson Corr.	-0.80179	-0.78808	-0.87592	0.57773	-0.98879	-0.77298	-0.86214	-0.92776	0.9872	-0.22643	0.88594	-0.96381
	p-value	0.19821	0.21192	0.12408	0.42227	0.01121	0.22702	0.13786	0.07224	0.0128	0.77357	0.11406	0.03619
Rural population	Pearson Corr.	0.97975	0.45007	0.58764	-0.17617	0.92937	0.44099	0.57734	0.68736	-0.9254	-0.20411	-0.60453	0.87796
	p-value	0.02025	0.54993	0.41236	0.82383	0.07063	0.55901	0.42266	0.31264	0.0746	0.79589	0.39547	0.12204
annual temp.	Pearson Corr.	-0.98363	-0.49443	-0.69724	-0.62269	-0.9853	-0.99932	-0.99027	-0.7385	0.87787	0.96864	0.72433	-0.99989
	p-value	0.11533	0.67075	0.50882	0.57208	0.10928	0.02343	0.08888	0.47107	0.31793	0.15986	0.4843	0.00952
Annual precipitation	Pearson Corr.	-0.8033	-0.06033	-0.30955	-0.90398	-0.80892	-0.88062	-0.82734	-0.36537	0.57662	0.75971	0.34594	-0.90396
	p-value	0.40615	0.96157	0.79964	0.28126	0.4001	0.31425	0.3797	0.76189	0.60875	0.45068	0.77512	0.28129
annual sunshine	Pearson Corr.	0.72974	0.99286	0.99093	-0.25887	0.72321	0.62379	0.70071	0.98123	-0.90703	-0.77574	-0.98502	0.58251
	p-value	0.47929	0.07613	0.0858	0.8333	0.48534	0.57119	0.50573	0.12355	0.27669	0.43476	0.11032	0.60414
Arable land	Pearson Corr.	-0.70019	-0.99701	-0.98437	0.29946	-0.69337	-0.5902	-0.66993	-0.9722	0.88842	0.74837	0.97686	-0.54763
	p-value	0.5062	0.04922	0.11271	0.80638	0.51225	0.5981	0.53265	0.15047	0.30361	0.46167	0.13723	0.63106
pesticide use	Pearson Corr.	-0.99107	-0.73932	-0.88496	-0.34974	-0.98976	-0.96159	-0.98468	-0.91101	0.98302	0.99797	0.90224	-0.94609
	p-value	0.08512	0.47029	0.30836	0.77254	0.09117	0.17703	0.11157	0.27061	0.11747	0.0406	0.28384	0.20998
Aquatic products	Pearson Corr.	-0.92002	-0.89167	-0.97689	-0.08822	-0.91625	-0.85407	-0.90295	-0.98784	0.99644	0.94515	0.98439	-0.82601
	p-value	0.25635	0.29907	0.13714	0.94377	0.2624	0.34825	0.2828	0.09938	0.05376	0.21182	0.11262	0.38121
Railway mileage	Pearson Corr.	-0.95664	-0.39198	-0.61086	-0.70793	-0.95936	-0.98859	-0.96791	-0.65671	0.81747	0.93394	0.6409	-0.99506
	p-value	0.18816	0.74358	0.58165	0.49926	0.18211	0.09626	0.16171	0.54389	0.39075	0.23269	0.55713	0.0633
Inland waterway mileage	Pearson Corr.	-0.95088	-0.84846	-0.95434	-0.17537	-0.9479	-0.89646	-0.9372	-0.97036	0.99999	0.97019	0.96513	-0.87233
	p-value	0.20036	0.35506	0.19313	0.88778	0.20641	0.29226	0.22681	0.15537	0.00224	0.15583	0.16861	0.32522
Road mileage	Pearson Corr.	-0.93656	-0.33371	-0.56018	-0.75069	-0.93985	-0.97724	-0.95031	-0.60829	0.77987	0.90978	0.59166	-0.98691
	p-value	0.22798	0.7834	0.62147	0.45944	0.22193	0.13608	0.20153	0.58371	0.43057	0.27251	0.59695	0.10312
Industrial wastewater	Pearson Corr.	0.65669	0.99984	0.97221	-0.35542	0.64949	0.54137	0.6248	0.95663	-0.85969	-0.70779	-0.96248	0.49714
	p-value	0.54391	0.01151	0.15042	0.76867	0.54996	0.63581	0.57036	0.18818	0.34132	0.49938	0.17494	0.66877

## Sheet: Table S4
Table S3 Rotated loadings (Quartimax method) of all the climate and social-economic parameters on the two factors
	Factor1 (52.3%)	Factor2 (13.5%)
primary industry added value	0.84521	-0.09054
secondary industry added value	0.93683	-0.11339
industry added value	0.93405	-0.11222
Construction industry value added	0.91687	-0.11976
tertiary industry added value	0.94199	0.00509
GDP per capita	0.64154	-0.13964
primary industry ratio	-0.41731	0.35833
secondary industry ratio	0.48274	-0.64446
tertiary industry ratio	-0.04061	0.57545
Total population	0.79122	0.04508
Urban population	0.96233	0.03686
Rural population	0.52837	0.04318
annual temp.	0.31899	0.84517
Annual precipitation	0.30658	0.81662
annual sunshine	-0.23011	-0.64888
Arable land	0.2146	-0.56709
pesticide use	0.75077	0.06192
Aquatic products	0.72999	0.27876
Railway mileage	0.16635	-0.7486
Inland waterway mileage	0.60895	0.32691
Road mileage	0.63246	-0.26803
Industrial wastewater	0.8576	0.17501
Domestic wastewater	0.90316	0.22562
Domestic wastewater COD	0.84453	0.1538
Urban built-up area	0.96347	-0.12577
Urban land acquisition	0.53379	-0.24684
Road area	0.95311	-0.07038
Urban drainage	0.93731	-0.03215
Urban sewage treatment capacity	0.88838	0.06991
Urban green space	0.86207	0.14893
Urban annual water supply	0.83744	0.21081
Municipal solid waste	0.8464	-0.186
